# Supplementary material for: KIAA0100 Modulates Cancer Cell Aggression Behavior of MDA-MB-231 through Microtubule and Heat Shock Proteins
Source: Cancers (Basel). 2018 Jun 4;10(6):180. doi: 10.3390/cancers10060180 (PMC6025110; doi:10.3390/cancers10060180)
Supplement: Supplementary file 1 [file cancers-10-00180-s001.pdf]

# Supplementary Materials: KIAA0100 Modulates Cancer Cell Aggression Behavior of MDA-MB-231 through Microtubule and Heat Shock Proteins

Zhenyu Zhong, Vaishali Pannu, Matthew Rosenow, Adam Stark and David Spetzler

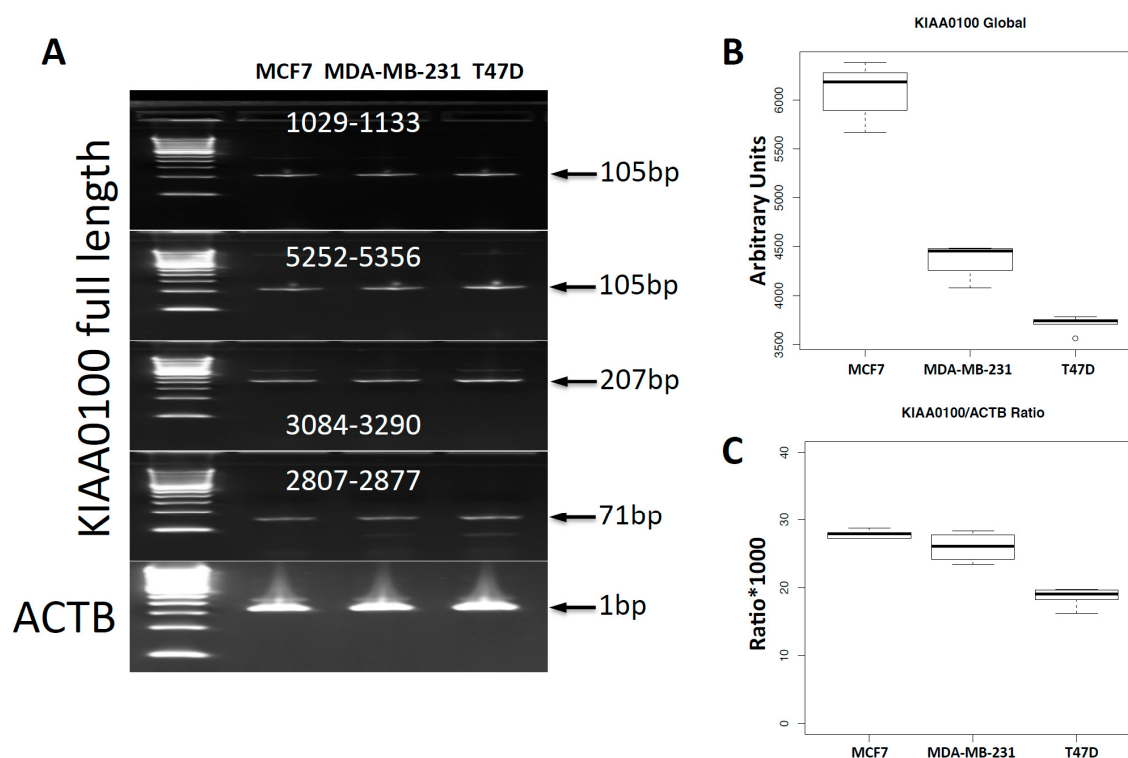

**Figure S1.** Expression of full length KIAA0100 in three breast cancer cell lines. (A) RT-PCR of full length KIAA0100 by targeting different regions of the mRNA on MCF7, MDA-MB-231. 4 sets of primers targeted to different region of the full length KIAA0100 mRNA was used. All three cell lines were confirmed to express full length KIAA0100; (B) semi-quantitative mass spectrometry analysis of KIAA0100 in the three different cell lines, normalized globally. Expression of KIAA0100 in MCF7 > MDA-MB-231 > T47D, however, they are at similar range within 2 fold difference; (C) semi-quantitative mass spectrometry analysis of KIAA0100 in the three different cell lines, normalized by  $\beta$ -actin. Expression of KIAA0100 in MCF7 and MDA-MB-231 were similar while T47D was slightly lower, but they are all at similar level range with minor difference.

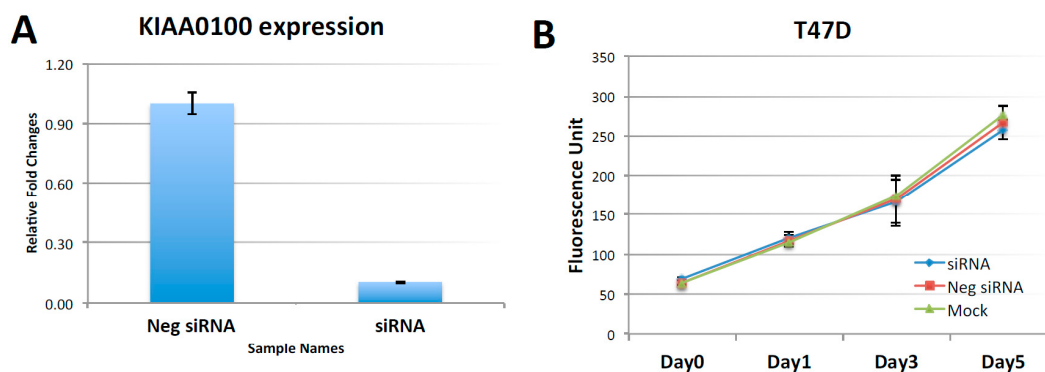

**Figure S2** Silencing expression of KIAA0100 in breast cancer cell T47D. T47D cells were transfected with KIAA0100 siRNA in a forward transfection manner, qPCR was used to examine the reduction of KIAA0100 mRNA 24 hours after the treatment. Cell proliferation/growth was examined. (A) RT-qPCR showed the efficiency of silencing the expression of KIAA0100 in T47D. 24 hours after the treatment, mRNA level of KIAA0100 was reduced >80%; (B) Anchorage-dependent cell proliferation/growth was examined for up to 5 days after treatment, no significant difference between the Mock, neg siRNA control treated cell and the KIAA0100 siRNA treated cells.

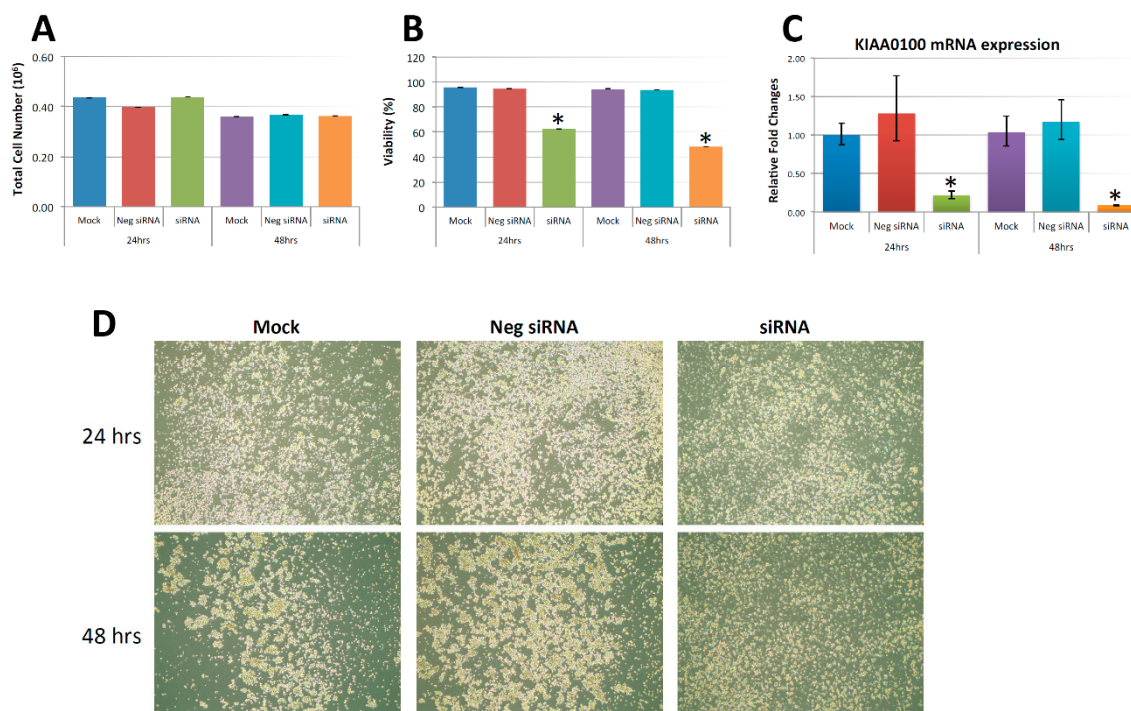

**Figure S3.** Silencing expression of KIAA0100 in breast cancer cell MDA-MB-231 by siRNA targeted to exon 17. (A) Total cell number in 24 and 48 hours after treatment; (B) Cell viability in 24 and 48 hours after the treatment; (C) KIAA0100 RNA expression level in 24 and 48 hours after the treatment by qPCR; (D) Cell aggregation in 24 and 48 hours after the treatment under microscope (\*  $p < 0.05$ ). Images were acquired at 40x.

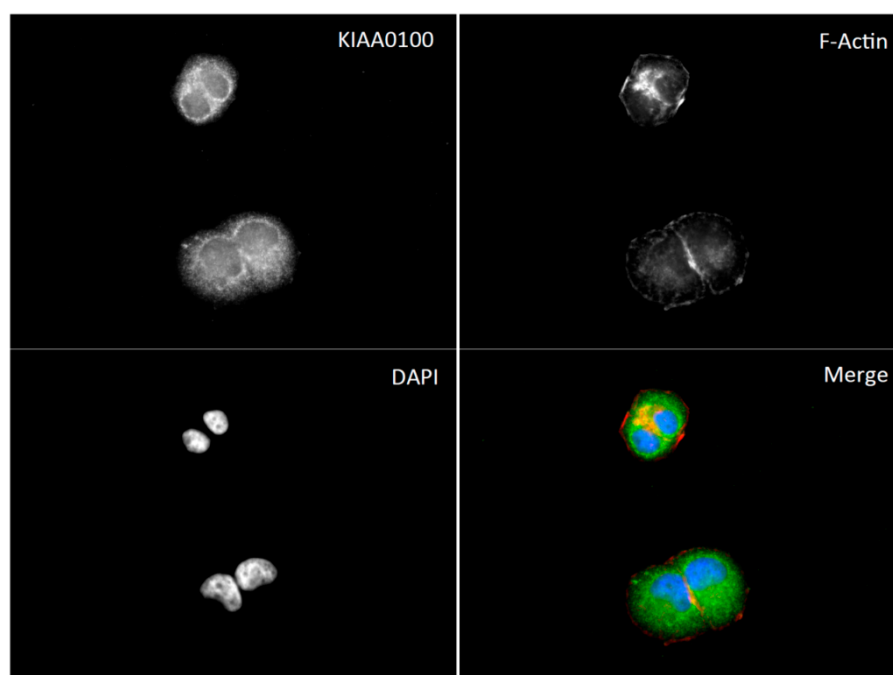

**Figure S4.** Immunofluorescence of native KIAA0100 protein in breast cancer cell T47D. KIAA0100 was co-immunostained with anti-KIAA010 antibody and Phalloidin-564 as well as DAPI. Native KIAA0100 stained as in the cytoplasm as speckles, the pattern is similar to that from MDA-MB-231. Images were acquired at 400x.

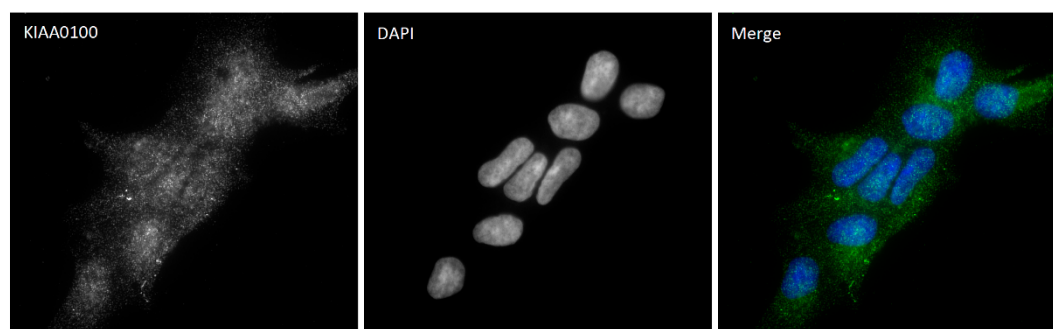

**Figure S5.** Immunofluorescence of native KIAA0100 protein in HEK293. KIAA0100 was immunostained with anti-KIAA010 antibody and DAPI. Native KIAA0100 stained as in the cytoplasm as speckles, the pattern of KIAA0100 is also similar to that from MDA-MB-231 as well as T47D. Images were acquired at 400x.

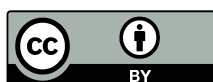

© 2018 by the authors. Licensee MDPI, Basel, Switzerland. This article is an open access article distributed under the terms and conditions of the Creative Commons Attribution (CC BY) license (<http://creativecommons.org/licenses/by/4.0/>).
